# Supplementary material for: Efficient Photoelectrochemical Water Oxidation by Metal-Doped Bismuth Vanadate Photoanode with Iron Oxyhydroxide Electrocatalyst
Source: Hindawi journal article supplement (doi:10.1155/2016/1827151), 2016-01-01
Supplement: f1 [file 1827151.f1.pdf]

## Supporting Information

### **Efficient Photoelectrochemical Water Oxidation by a Metal-doped Bismuth Vanadate Photoanode with a FeOOH Electrocatalyst**

Eun Jin Joo, Gisang Park, Ji Seon Gwak, Kyu Yeon Jang, Jong Hyeok Seo, Kyung Hee Oh, and Ki Min Nam\*

*Department of Chemistry, Mokpo National University, Jeonnam 534-729, Korea,*

E-mail: namkinin.chem@gmail.com

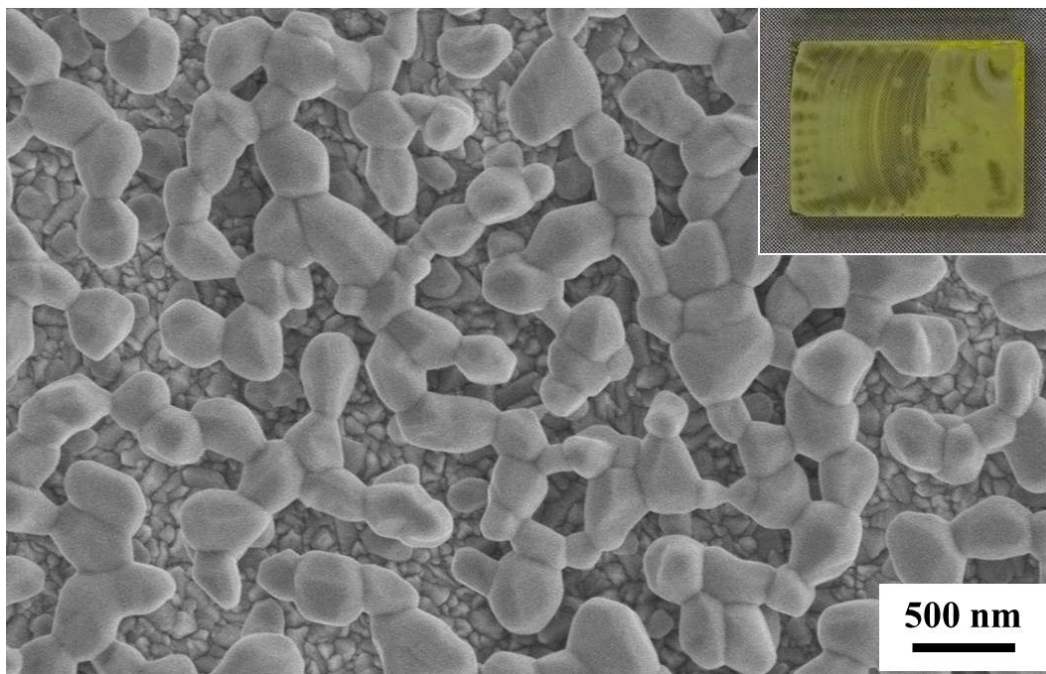

**Figure S1.** SEM top-view image and photographic image (inset) of W-Mo-doped BiVO<sub>4</sub> (without Nafion surfactant in the preparation step).

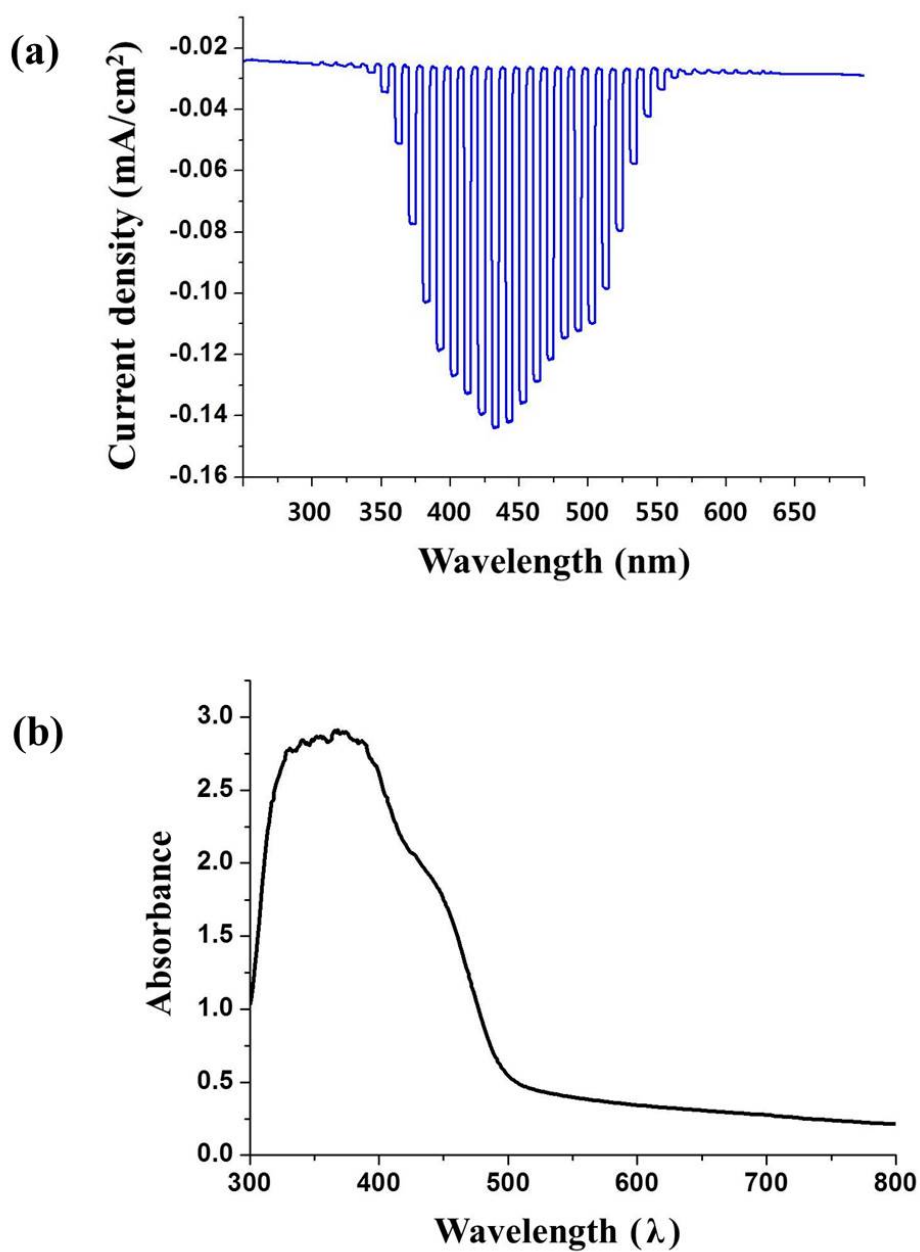

**Figure S2.** (a) Action spectrum of W-Mo-doped BiVO<sub>4</sub> electrode at an applied potential of 0.3 V versus Ag/AgCl under UV-visible illumination in 0.1 M Na<sub>2</sub>SO<sub>3</sub> + 0.1 M Na<sub>2</sub>SO<sub>4</sub>. (b) UV-vis absorption spectrum of W-Mo-doped BiVO<sub>4</sub> electrode.

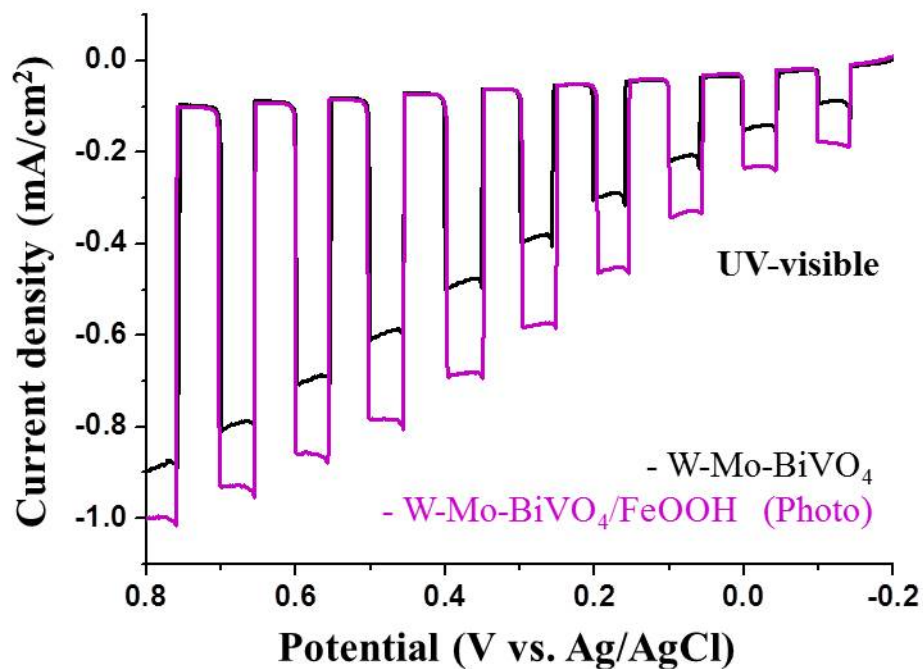

**Figure S3.** LSVs of W-Mo-doped BiVO<sub>4</sub> and W-Mo-doped BiVO<sub>4</sub>/FeOOH (photodeposited) electrodes under UV-visible illumination in phosphate buffer (pH 7). Scan rate: 20 mV/s. Light intensity: 100 mW/cm<sup>2</sup>.
